# Supplementary material
Source: PubMed Central journal article supplement (PMC4502993)
Supplement: ijcep0008-4284-f8.pdf [file ijcep0008-4284-f8.pdf]

## mERa modulating cardiac repair by BM c-kit<sup>+</sup> cells

**Supplementary Table 1.** Oligonucleotide primers used for gene expression analysis by real-time PCR

| Gene  | Primer sequences (5'-3')    | Location   |
|-------|-----------------------------|------------|
| Gapdh | Fwd: TGTGTCCGTCGTGGATCTGA   | 761-910    |
|       | Rev: TTGCTGTTGAAGTCGCAGGAG  |            |
| ERa   | Fwd: ACATGTTGCTGGCTACGTCA   | 1470-1798  |
|       | Rev: GGGCACAACGTTCTTGCAAT   |            |
| ERβ   | Fwd: AATGTGCTAGTGAGCCGTCC   | 1239-1503  |
|       | Rev: CCTCATCCCTGTCCAGAACG   |            |
| Gata4 | Fwd: CGGAAGCCCAAGAACCTGAATA | 1562 -1659 |
|       | Rev: TTGCTGGAGTTACCGCTGGAG  |            |
| Tbx5  | Fwd: AAGTCCGAAGTGGGGTCAC    | 10-433     |
|       | Rev: GGAAGACGTGGGTGCAAAC    |            |
| Ki67  | Fwd: CCTGCCCGACCCTACAAAAT   | 2248-2560  |
|       | Rev: TCCGCCGTCTTAAGGTAGGA   |            |
| Tbx3  | Fwd: GAGGCCAAGGAAC TTGGGA   | 1669-2022  |
|       | Rev: GCTTGGGAAGGCCAAAGTAA   |            |
| Akt   | Fwd: CTGGAGGACAACGACTACGG   | 1331-1762  |
|       | Rev: CTCACTGTCCACACTCCAT    |            |
| Notch | Fwd: GCTCCGAGGAGATCAACGAG   | 3803-4070  |
|       | Rev: TTGACATCACCTCACACCG    |            |

mERa modulating cardiac repair by BM c-kit<sup>+</sup> cells

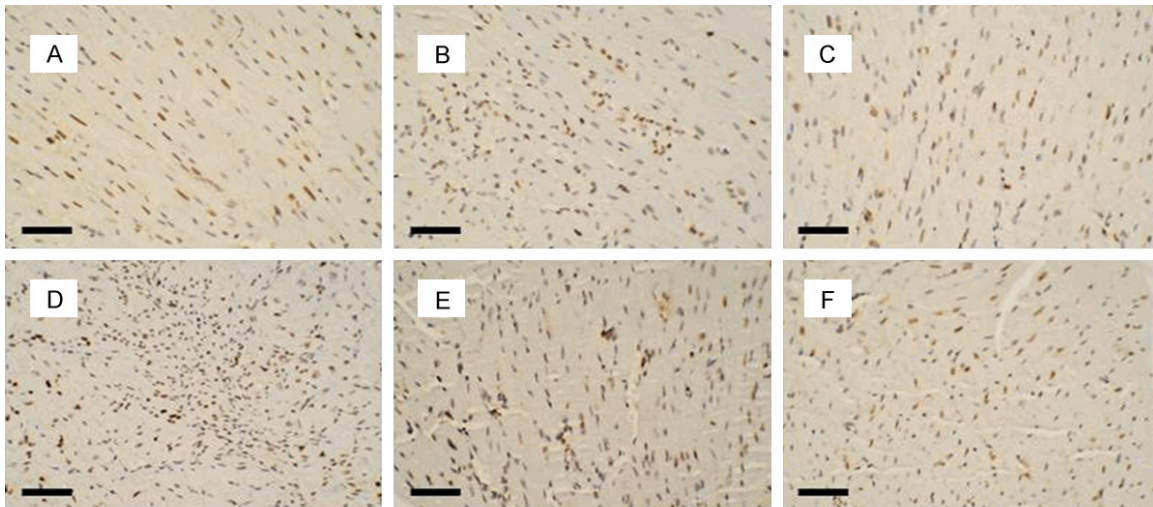

G

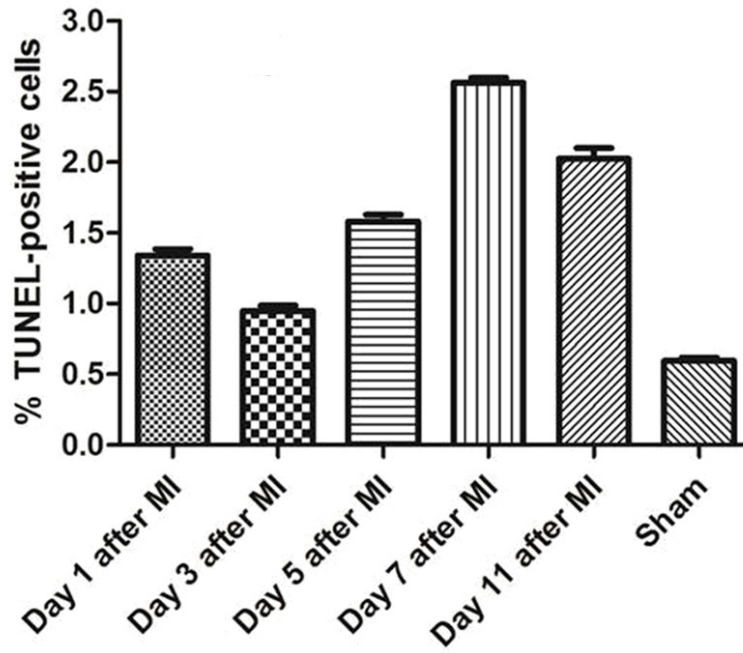

**Supplementary Figure 1.** TUNEL staining for heart sections from mouse in different days of AMI and sham mouse (A-E) TUNEL staining for heart sections from mouse in day 2, 3, 5, 7 and 11 after MI; (F) TUNEL staining for heart sections from Sham-operated mouse; (G) Analysis of TUNEL positive cells in heart sections after AMI. Scale bar =50 μm.

mERa modulating cardiac repair by BM c-kit<sup>+</sup> cells

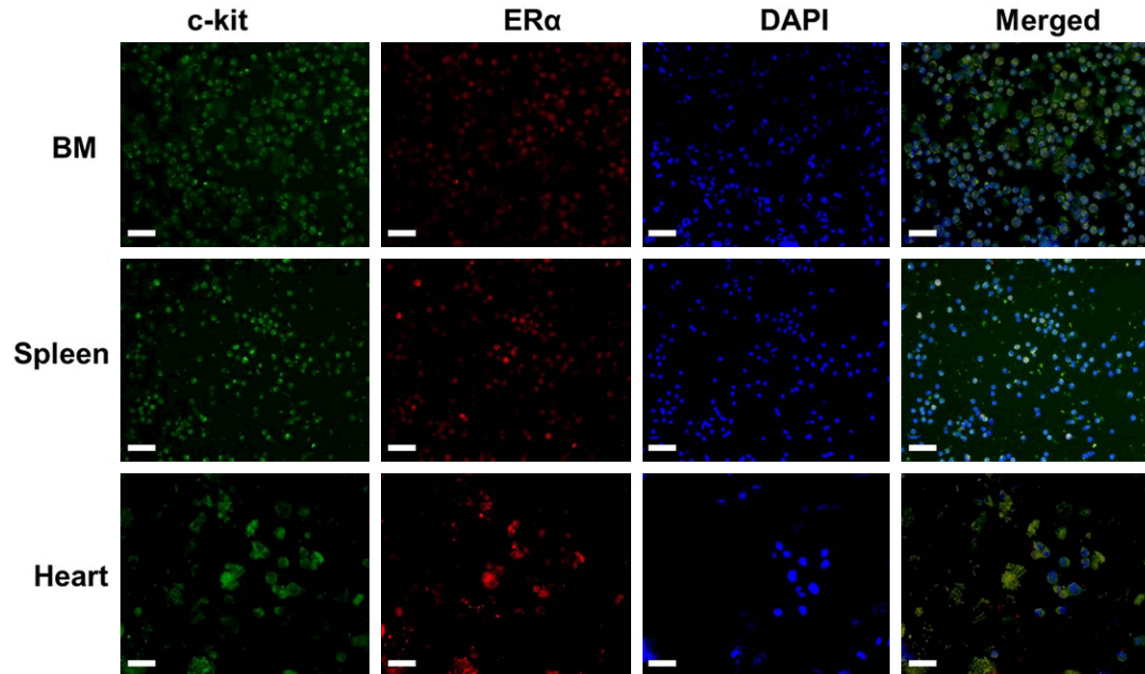

**Supplementary Figure 2.** Immunofluorescence staining images of c-kit and ERα in BM, Spleen and heart after 7 days of AMI. After MI, ERα expressions were detected in BM, spleen and heart, especially in c-kit<sup>+</sup> cells. Scale bar =25 μm.
